# Supplementary material
Source: publisher site journal article supplement (https://www.dovepress.com/article/307694)
Supplement: Supplementary file 1 [file get_supplementary_file.php]

**Appendix A.**  **Introductory Information**

**Background**: The aim of this study is to learn more about the various factors that may influence physicians' acceptance or rejection of point-of-care pharmacogenetic testing (POC-PGx) such as sociodemographic characteristics, knowledge, and attitudes. The acceptance POC-PGx testing and its recommendations by physicians when providing clinical services to patients at the time of care, would eventually decide how commonly POC-PGx is used in standard medical practice for personalized medicine. If you agree to take part, you will be required to fill out a paper-based survey questionnaire. The questionnaire will help the researcher evaluate prescribers' understanding and perceptions of office-based pharmacogenetics testing, as well as the obstacles to its use as a novel diagnostic tool. The questionnaire takes about ten minutes to complete.

**Participants' Risks and Benefits:** There are no known risks associated with your participation in this study. While you will receive no direct benefits from participating in this survey, please keep in mind that, while your involvement in this research will not directly benefit you, it will help to fill a critical gap in our understanding of the obstacles to the adoption of POC-PGx testing. There is mounting evidence that POC-PGx may assist you as a prescriber in making informed prescribing decisions that increase medication effectiveness while reducing side effects. If you have any questions or concerns about your involvement in this report, please contact the Principal Investigator.

**Costs and Participant Payments:** Participation is entirely voluntary, and there will be no monetary compensation for devoting your valuable time to completing the survey.

**Confidentiality**: The data collected contains no publicly identifying information, and the probability of connecting it to specific persons is minimal. Furthermore, sufficient safeguards are in place to protect participants' privacy and information from unauthorized entry, usage, disclosure, alteration, loss, and theft.

I have read this letter and willingly agree to participate because I completely understand the contents of this document. All of my research-related questions have been answered. If I have any more questions regarding this study, I will contact the aforementioned investigator or his/her staff. I understand that by completing this questionnaire, I am agreeing to participate in this study.

Signature____________Date_____________

**Appendix B.**

# **Pharmacogenetic Testing**

**Physician Survey**

**Knowledge**

| **This survey asks about your knowledge in regard to the following Pharmacogenetic (PGx)-related statements** |
| --- |

1. **For each of the following items check (X) if you think it is true, false, or not sure**

| **Measure** | **True** | **False** | **Not Sure** |
| --- | --- | --- | --- |
| 1. A patient’s genetic make-up influencing drug response can change over a person’s lifetime |  |  |  |
| 1. Genetic variations can account for as much as 95% of the variability of an individual’s response to a medication |  |  |  |
| 1. People with genetic differences can respond differently to the same medication |  |  |  |
| 1. Pharmacogenetic testing is currently available for all medications |  |  |  |
| 1. The Food and Drug Administration (FDA) has revised drug labels of warfarin to include information about pharmacogenetics |  |  |  |
| 1. FDA has revised drug labels of clopidogrel (Plavix) to include information about pharmacogenetics |  |  |  |
| 1. The intensity of adverse events of some medications may depend on a person’s genetic make-up |  |  |  |

*The correct answer for questions 1 and 4 is “No” the correct answers for questions 2, 3, 5, 6,7 is “Yes”

**Attitudes**

| **This survey asks about your preference with regard to the following statements regarding Point-of-Care Pharmacogenetic (PGx) Testing (i.e., at patients’ bedside or in the doctor's office)** |
| --- |

1. **On a scale from 1 to 5, indicate your agreement with the following items:**

| ---**Strongly Disagree** (SD) | **-----------Disagree (D)** | **--------------Neutral (N)** | **------------Agree (A)** | **---Strongly Agree (SA)** |
| --- | --- | --- | --- | --- |

| **Measure** | **SD** | **D** | **N** | **A** | **SA** |
| --- | --- | --- | --- | --- | --- |
| 1. POC-PGx testing can potentially optimize the safety and efficacy of medication better than the current traditional way of prescribing drugs. (**Attitude1**) |  |  |  |  |  |
| 1. I think that POC-PGx testing may prevent prescribing a wrong medicine. (**Attitude2**) |  |  |  |  |  |
| 1. I am concerned about the effect of the POC-PGx testing results on my patients’ employment opportunities. (**Attitude3**) |  |  |  |  |  |
| 1. POC-PGx testing will help in reducing the cost of developing new drugs. (**Attitude4**) |  |  |  |  |  |
| 1. I am concerned that unauthorized personnel may gain access to the POC-PGx testing results. (**Attitude5**) |  |  |  |  |  |
| 1. I am concerned about the effect of the POC-PGx testing results on my patients’ eligibility for private health insurance. (**Attitude6**) |  |  |  |  |  |
| 1. POC-PGx testing is crucial in cases with non-response or potential life-threatening drug reactions. (**Perceived need**) |  |  |  |  |  |
| 1. I believe that POC-PGx testing will help to decrease the number of adverse drug events. (**Relative advantage**) |  |  |  |  |  |
| 1. POC-PGx testing is compatible with the current practice of prescribing and mentoring medications. (**Compatibility**) |  |  |  |  |  |
| 1. POC-PGx testing is difficult to deal with in the current clinical practice compared to other routine lab tests. (**Complexity**) |  |  |  |  |  |
| 1. I would like to try POC-PGx testing if offered as free samples. (**Trialability**) |  |  |  |  |  |
| 1. I would like to adopt POC-PGx testing as soon as it becomes available. (**Innovativeness**) |  |  |  |  |  |
| 1. The clinical outcomes of using POC-PGx testing are visible at my workplace. (**Observability)** |  |  |  |  |  |

4. **How have you learned about genetics and genetic testing? (*Check all that apply*)**

 No, I have not received education in genetics

 Genetics training in medical/pharmacy school

 Genetics training in residency

 Undergraduate Genetics Course

 Genetics Course in Graduate School

 Grand Rounds

 CME Course

 Genetics-related Seminar or Workshop

 Other ____________________

(*Specify*)

5. **How would you rate your current understanding of the role Point-of-care PGx testing in therapeutic decision-making**?

 Excellent  Very Good Good  Fair  Poor

6. **Are Point-of-care PGx tests available at your primary place of employment?**

 Yes  No  Not Sure

**7. Have you ever been a part of the Point-of-Care PGx testing implementation process (ordering tests or interpreting results)?**

 Yes  No

8. **Have you ever talked with a patient about PGx testing?**

 Yes  No  Not Sure

**9. As a Physicina, I do not feel obligated towards POC-PGx testing due to the following concerns(s):**

 Lack of time

 Legal consequences

 The potential extra work needed for genetic interpretation and confirmation

 Lack of compensation

 The uncertain accuracy of genotypic predictions

 Gaps in gene sequencing technology (i.e., sequencing speed, accuracy, cost)

 The potential harms of false positives to unwary patients and their relatives

19. **Are you willing to accept point-of-care PGx testing in the same way as you would order regular lab tests for patients?**

 Yes  No

# **Gender:**  M  F

#

21. . **Duration of practice (year):**  1-5  6-10  11-15  16-20  21 or greater

22. . **What is your medical specialty?**

 Internal Medicine **If Yes;**

- Cardiology
- Endocrinology
- Nephrology
- Gastroenterology
- Infectious Disease

 Family Medicine

 General Surgery

 Pediatrics

 Other (please specify)__________________

23. **What is your current professional status? (*Check all that apply*)**

 Employed by a governmental hospital

 Employed by a private Hospital

 Practice owner/partner/ associate

 Academic Medical Center

 Other____________________

24. **Type of work setting: (*Check all that apply*)**

 Urban

 Suburban

 Rural

**“Thank You for Participating in this Survey”**
